# Supplementary material for: The Effect of Response Conditions on Food Images-Evoked Emotions Measured Using the Valence × Arousal Circumplex-Inspired Emotion Questionnaire (CEQ)
Source: MDPI journal article supplement (doi:10.3390/foods12112250), 2023-06-02
Supplement: s1 [file s1]

**Supplementary Table S1. A contingency table of the proportions of citations by 105 participants across the 14 food image samples for individual pairs of emotion terms in the single response condition of Study 1**

| Emotion-related terms     | BA <sup>1</sup>        | BE          | BR           | BT          | CA          | CO           | CR          | GT         | GF           | HA          | KI           | MO         | SA          | ST          | <i>p</i> -value |
|---------------------------|------------------------|-------------|--------------|-------------|-------------|--------------|-------------|------------|--------------|-------------|--------------|------------|-------------|-------------|-----------------|
| Active/<br>Alert          | 0.01 <sup>2</sup><br>c | 0.02<br>c   | 0.10<br>abc  | 0.00<br>c   | 0.08<br>abc | 0.13<br>ab   | 0.03<br>bc  | 0.00<br>c  | 0.07<br>abc  | 0.04<br>bc  | 0.16<br>a    | 0.00<br>c  | 0.01<br>c   | 0.10<br>abc | < 0.001         |
| Energetic/<br>Excited     | 0.03<br>cde            | 0.04<br>cde | 0.10<br>bcde | 0.00<br>e   | 0.20<br>ab  | 0.05<br>cde  | 0.07<br>cde | 0.00<br>e  | 0.14<br>abcd | 0.02<br>de  | 0.15<br>abc  | 0.00<br>e  | 0.01<br>e   | 0.25<br>a   | < 0.001         |
| Enthusiastic/<br>Inspired | 0.00<br>b              | 0.03<br>b   | 0.04<br>b    | 0.00<br>b   | 0.02<br>b   | 0.02<br>b    | 0.00<br>b   | 0.00<br>b  | 0.05<br>b    | 0.01<br>b   | 0.15<br>a    | 0.00<br>b  | 0.00<br>b   | 0.04<br>b   | < 0.001         |
| Happy/<br>Satisfied       | 0.03<br>de             | 0.20<br>cd  | 0.12<br>cde  | 0.01<br>e   | 0.64<br>a   | 0.15<br>cde  | 0.30<br>bc  | 0.03<br>de | 0.23<br>bc   | 0.02<br>e   | 0.24<br>bc   | 0.00<br>e  | 0.04<br>de  | 0.40<br>b   | < 0.001         |
| Secure/<br>At ease        | 0.01<br>fg             | 0.31<br>abc | 0.23<br>bcd  | 0.00<br>g   | 0.01<br>fg  | 0.17<br>cdef | 0.43<br>a   | 0.36<br>ab | 0.11<br>defg | 0.00<br>g   | 0.20<br>bcde | 0.00<br>g  | 0.02<br>fg  | 0.04<br>efg | < 0.001         |
| Relaxed/<br>Calm          | 0.02<br>bc             | 0.18<br>b   | 0.16<br>bc   | 0.00<br>c   | 0.04<br>bc  | 0.41<br>a    | 0.09<br>bc  | 0.52<br>a  | 0.10<br>bc   | 0.01<br>c   | 0.07<br>bc   | 0.00<br>c  | 0.10<br>bc  | 0.15<br>bc  | < 0.001         |
| Passive/<br>Quiet         | 0.04<br>a              | 0.08<br>a   | 0.09<br>a    | 0.01<br>a   | 0.00<br>a   | 0.03<br>a    | 0.07<br>a   | 0.06<br>a  | 0.05<br>a    | 0.07<br>a   | 0.02<br>a    | 0.00<br>a  | 0.10<br>a   | 0.00<br>a   | < 0.001         |
| Dull/<br>Bored            | 0.05<br>abc            | 0.12<br>a   | 0.11<br>ab   | 0.02<br>bc  | 0.01<br>bc  | 0.01<br>bc   | 0.01<br>bc  | 0.02<br>bc | 0.10<br>abc  | 0.08<br>abc | 0.00<br>c    | 0.00<br>c  | 0.11<br>ab  | 0.01<br>bc  | < 0.001         |
| Blue/<br>Uninspired       | 0.06<br>abc            | 0.01<br>c   | 0.05<br>bc   | 0.13<br>ab  | 0.00<br>c   | 0.00<br>c    | 0.01<br>c   | 0.00<br>c  | 0.05<br>bc   | 0.13<br>ab  | 0.00<br>c    | 0.12<br>ab | 0.15<br>a   | 0.01<br>c   | < 0.001         |
| Unhappy/<br>Dissatisfied  | 0.34<br>b              | 0.01<br>c   | 0.01<br>c    | 0.52<br>a   | 0.00<br>c   | 0.00<br>c    | 0.00<br>c   | 0.01<br>c  | 0.05<br>c    | 0.22<br>b   | 0.00<br>c    | 0.36<br>b  | 0.24<br>b   | 0.00<br>c   | < 0.001         |
| Tense/<br>Bothered        | 0.36<br>a              | 0.00<br>d   | 0.01<br>d    | 0.26<br>ab  | 0.01<br>d   | 0.03<br>cd   | 0.01<br>d   | 0.00<br>d  | 0.05<br>cd   | 0.32<br>ab  | 0.01<br>d    | 0.40<br>a  | 0.18<br>bc  | 0.10<br>d   | < 0.001         |
| Jittery/<br>Nervous       | 0.06<br>abc            | 0.00<br>c   | 0.00<br>c    | 0.05<br>abc | 0.00<br>c   | 0.00<br>c    | 0.00<br>c   | 0.00<br>c  | 0.03<br>bc   | 0.09<br>ab  | 0.00<br>c    | 0.11<br>a  | 0.06<br>abc | 0.00<br>c   | < 0.001         |

<sup>1</sup>BA = baluts; BE = boiled eggs; BR = broccoli; BT = burnt toast; CA = cake; CO = coffee; CR = cooked rice; GT = green tea; HA = haggis; KI = Kimchi; MO = molded oranges; RA = rotten avocado; ST = steak

<sup>2</sup>The proportions with different letters within a row represent a significant difference at  $p < 0.05$ .

**Supplementary Table S2. A contingency table of the proportions of citations by 105 participants across the 14 food image samples for individual pairs of emotion terms in the multiple response condition of Study 1**

| Emotion-related terms     | BA <sup>1</sup>         | BE          | BR         | BT           | CA          | CO          | CR           | GT           | GF           | HA          | KI          | MO          | SA          | ST          | <i>P</i> -value |
|---------------------------|-------------------------|-------------|------------|--------------|-------------|-------------|--------------|--------------|--------------|-------------|-------------|-------------|-------------|-------------|-----------------|
| Active/<br>Alert          | 0.07 <sup>2</sup><br>de | 0.20<br>cde | 0.31<br>bc | 0.02<br>e    | 0.51<br>a   | 0.31<br>bc  | 0.10<br>de   | 0.04<br>de   | 0.22<br>cd   | 0.09<br>de  | 0.47<br>ab  | 0.02<br>e   | 0.06<br>de  | 0.41<br>ab  | < 0.001         |
| Energetic/<br>Excited     | 0.05<br>bcde            | 0.20<br>bcd | 0.22<br>bc | 0.01<br>de   | 0.68<br>a   | 0.24<br>b   | 0.20<br>bcd  | 0.00<br>e    | 0.22<br>bc   | 0.04<br>cde | 0.50<br>a   | 0.00<br>e   | 0.03<br>cde | 0.64<br>a   | < 0.001         |
| Enthusiastic/<br>Inspired | 0.02<br>bc              | 0.09<br>bc  | 0.08<br>bc | 0.01<br>c    | 0.37<br>a   | 0.17<br>b   | 0.09<br>bc   | 0.00<br>c    | 0.15<br>bc   | 0.03<br>bc  | 0.39<br>a   | 0.00<br>c   | 0.04<br>bc  | 0.41<br>a   | < 0.001         |
| Happy/<br>Satisfied       | 0.08<br>d               | 0.51<br>c   | 0.48<br>c  | 0.01<br>d    | 0.91<br>a   | 0.58<br>bc  | 0.64<br>bc   | 0.51<br>c    | 0.45<br>c    | 0.02<br>d   | 0.67<br>bc  | 0.00<br>d   | 0.11<br>d   | 0.77<br>ab  | < 0.001         |
| Secure/<br>At ease        | 0.02<br>h               | 0.61<br>bc  | 0.48<br>cd | 0.01<br>h    | 0.25<br>efg | 0.65<br>abc | 0.82<br>ab   | 0.87<br>a    | 0.31<br>def  | 0.03<br>gh  | 0.51<br>cd  | 0.00<br>h   | 0.11<br>fgh | 0.43<br>cde | < 0.001         |
| Relaxed/<br>Calm          | 0.02<br>g               | 0.53<br>bcd | 0.55<br>bc | 0.00<br>g    | 0.18<br>efg | 0.71<br>ab  | 0.53<br>bcd  | 0.90<br>a    | 0.27<br>ef   | 0.03<br>g   | 0.31<br>def | 0.00<br>g   | 0.12<br>fg  | 0.40<br>cde | < 0.001         |
| Passive/<br>Quiet         | 0.02<br>c               | 0.21<br>ab  | 0.18<br>ab | 0.01<br>c    | 0.01<br>c   | 0.10<br>bc  | 0.12<br>bc   | 0.31<br>a    | 0.19<br>ab   | 0.11<br>bc  | 0.02<br>c   | 0.03<br>c   | 0.13<br>bc  | 0.00<br>c   | < 0.001         |
| Dull/<br>Bored            | 0.11<br>abcd            | 0.19<br>abc | 0.22<br>a  | 0.09<br>abcd | 0.01<br>d   | 0.05<br>cd  | 0.11<br>abcd | 0.14<br>abcd | 0.14<br>abcd | 0.20<br>ab  | 0.02<br>d   | 0.07<br>bcd | 0.23<br>a   | 0.01<br>d   | < 0.001         |
| Blue/<br>Uninspired       | 0.41<br>a               | 0.03<br>b   | 0.11<br>b  | 0.40<br>a    | 0.00<br>b   | 0.02<br>b   | 0.01<br>b    | 0.04<br>b    | 0.11<br>b    | 0.39<br>a   | 0.00<br>b   | 0.51<br>a   | 0.47<br>a   | 0.03<br>b   | < 0.001         |
| Unhappy/<br>Dissatisfied  | 0.73<br>ab              | 0.03<br>c   | 0.07<br>c  | 0.82<br>a    | 0.03<br>c   | 0.01<br>c   | 0.01<br>c    | 0.00<br>c    | 0.11<br>c    | 0.57<br>b   | 0.00<br>c   | 0.87<br>a   | 0.54<br>b   | 0.01<br>c   | < 0.001         |
| Tense/<br>Bothered        | 0.71<br>a               | 0.04<br>c   | 0.02<br>c  | 0.79<br>a    | 0.02<br>c   | 0.06<br>c   | 0.03<br>c    | 0.00<br>c    | 0.11<br>c    | 0.61<br>ab  | 0.03<br>c   | 0.82<br>a   | 0.46<br>b   | 0.02<br>c   | < 0.001         |
| Jittery/<br>Nervous       | 0.48<br>a               | 0.01<br>c   | 0.01<br>c  | 0.36<br>ab   | 0.02<br>c   | 0.03<br>c   | 0.00<br>c    | 0.00<br>c    | 0.09<br>c    | 0.40<br>ab  | 0.01<br>c   | 0.46<br>a   | 0.26<br>b   | 0.00<br>c   | < 0.001         |

<sup>1</sup>BA = baluts; BE = boiled eggs; BR = broccoli; BT = burnt toast; CA = cake; CO = coffee; CR = cooked rice; GT = green tea; HA = haggis; KI = Kimchi; MO = molded oranges; RA = rotten avocado; ST = steak

<sup>2</sup>The proportions with different letters within a row represent a significant difference at  $p < 0.05$ .

**Supplementary Table S3. Mean comparisons among the 14 food image samples with respect to valence or arousal dimension**

| Emotion-related terms | BA           | BE           | BR          | BT          | CA         | CO           | CR           | GT          | GF         | HA           | KI           | MO          | RA          | ST         | <i>P</i> -value |
|-----------------------|--------------|--------------|-------------|-------------|------------|--------------|--------------|-------------|------------|--------------|--------------|-------------|-------------|------------|-----------------|
| Valence               | -29.63<br>ab | 19.16<br>def | 17.28<br>de | -34.26<br>a | 31.59<br>h | 29.67<br>gh  | 23.62<br>efg | 27.82<br>gh | 14.49<br>d | -23.13<br>bc | 25.87<br>fgh | -36.80<br>a | -18.56<br>c | 31.89<br>h | < 0.001         |
| Arousal               | -23.81<br>ab | 14.86<br>cd  | 13.79<br>c  | -24.89<br>a | 27.58<br>f | 24.00<br>def | 17.85<br>cde | 10.87<br>c  | 13.19<br>c | -20.41<br>ab | 24.66<br>ef  | -28.33<br>a | -14.84<br>b | 28.69<br>f | < 0.001         |

BA = baluts; BE = boiled eggs; BR = broccoli; BT = burnt toast; CA = cake; CO = coffee; CR = cooked rice; GT = green tea; HA = haggis; KI = Kimchi; MO = molded oranges; RA = rotten avocado; ST = steak

<sup>2</sup>Mean ratings with different letters within a row represent a significant difference at  $p < 0.05$ .

**Supplementary Table S4. Demographic profiles of the 64 participants in Study 2**

| Category         | Subcategory                     | Frequency | Percentage (%) |
|------------------|---------------------------------|-----------|----------------|
| Gender           | Female                          | 43        | 67.2           |
|                  | Male                            | 20        | 31.3           |
|                  | Prefer not to answer            | 1         | 1.6            |
| Age group        | 20 to 29 years old              | 19        | 29.7           |
|                  | 30 to 39 years old              | 10        | 15.6           |
|                  | 40 to 49 years old              | 11        | 17.2           |
|                  | 50 to 59 years old              | 11        | 17.2           |
|                  | 60 to 69 years old              | 7         | 10.9           |
|                  | ≥ 70 years old                  | 6         | 9.4            |
| Education        | High school                     | 8         | 12.5           |
|                  | Some college                    | 7         | 10.9           |
|                  | 2-year or 4-year college        | 24        | 37.5           |
|                  | Master's degree                 | 19        | 29.7           |
|                  | Doctoral or professional degree | 6         | 9.4            |
| Household income | < \$20,000                      | 16        | 25.0           |
|                  | \$20,000 to \$39,999            | 13        | 20.3           |
|                  | \$40,000 to \$59,999            | 8         | 12.5           |
|                  | \$60,000 to \$79,999            | 10        | 15.6           |
|                  | \$80,000 to \$99,999            | 8         | 12.5           |
|                  | ≥ \$100,000                     | 9         | 14.1           |
| Ethnicity        | Caucasian                       | 45        | 70.3           |
|                  | African American                | 7         | 10.9           |
|                  | Asian                           | 8         | 12.5           |
|                  | Pacific Island                  | 1         | 1.6            |
|                  | Other                           | 3         | 4.7            |

**Supplementary Table S5. A contingency table of the proportions of citations by 64 participants across the 14 food image samples for individual pairs of emotion terms in the single response condition of Study 2**

| Emotion-related terms     | BA          | BE          | BR          | BT         | CA         | CO          | CR         | GT          | GF          | HA          | KI          | MO         | SA          | ST         | <i>P</i> -value |
|---------------------------|-------------|-------------|-------------|------------|------------|-------------|------------|-------------|-------------|-------------|-------------|------------|-------------|------------|-----------------|
| Active/<br>Alert          | 0.03<br>ab  | 0.06<br>ab  | 0.03<br>ab  | 0.00<br>b  | 0.02<br>ab | 0.14<br>a   | 0.03<br>ab | 0.05<br>ab  | 0.03<br>ab  | 0.02<br>ab  | 0.13<br>ab  | 0.00<br>b  | 0.03<br>ab  | 0.09<br>ab | < 0.001         |
| Energetic/<br>Excited     | 0.03<br>b   | 0.09<br>b   | 0.02<br>b   | 0.00<br>b  | 0.38<br>a  | 0.13<br>b   | 0.00<br>b  | 0.02<br>b   | 0.05<br>b   | 0.03<br>b   | 0.13<br>b   | 0.00<br>b  | 0.00<br>b   | 0.14<br>b  | < 0.001         |
| Enthusiastic/<br>Inspired | 0.02<br>b   | 0.02<br>b   | 0.03<br>b   | 0.02<br>b  | 0.19<br>a  | 0.08<br>ab  | 0.09<br>ab | 0.02<br>b   | 0.06<br>ab  | 0.02<br>b   | 0.11<br>ab  | 0.00<br>b  | 0.03<br>b   | 0.11<br>ab | < 0.001         |
| Happy/<br>Satisfied       | 0.00<br>d   | 0.25<br>abc | 0.17<br>bcd | 0.00<br>d  | 0.33<br>ab | 0.19<br>bcd | 0.06<br>cd | 0.03<br>d   | 0.09<br>cd  | 0.02<br>d   | 0.14<br>bcd | 0.00<br>d  | 0.05<br>d   | 0.44<br>a  | < 0.001         |
| Secure/<br>At ease        | 0.00<br>c   | 0.20<br>ab  | 0.13<br>abc | 0.02<br>c  | 0.02<br>c  | 0.09<br>abc | 0.23<br>a  | 0.09<br>abc | 0.03<br>c   | 0.00<br>c   | 0.03<br>c   | 0.00<br>c  | 0.03<br>c   | 0.06<br>bc | < 0.001         |
| Relaxed/<br>Calm          | 0.03<br>c   | 0.17<br>bc  | 0.17<br>bc  | 0.00<br>c  | 0.02<br>c  | 0.16<br>bc  | 0.28<br>b  | 0.56<br>a   | 0.02<br>c   | 0.02<br>c   | 0.06<br>c   | 0.00<br>c  | 0.06<br>c   | 0.00<br>c  | < 0.001         |
| Passive/<br>Quiet         | 0.00<br>b   | 0.03<br>ab  | 0.14<br>a   | 0.00<br>b  | 0.00<br>b  | 0.05<br>ab  | 0.06<br>ab | 0.14<br>a   | 0.02<br>b   | 0.00<br>b   | 0.03<br>ab  | 0.02<br>b  | 0.02<br>b   | 0.02<br>b  | < 0.001         |
| Dull/<br>Bored            | 0.00<br>c   | 0.08<br>bc  | 0.23<br>a   | 0.06<br>bc | 0.05<br>bc | 0.02<br>c   | 0.17<br>ab | 0.06<br>bc  | 0.03<br>bc  | 0.06<br>bc  | 0.03<br>bc  | 0.00<br>c  | 0.11<br>abc | 0.02<br>c  | < 0.001         |
| Blue/<br>Uninspired       | 0.11<br>a   | 0.02<br>a   | 0.03<br>a   | 0.08<br>a  | 0.00<br>a  | 0.05<br>a   | 0.05<br>a  | 0.00<br>a   | 0.05<br>a   | 0.06<br>a   | 0.09<br>a   | 0.03<br>a  | 0.09<br>a   | 0.03<br>a  | 0.067           |
| Unhappy/<br>Dissatisfied  | 0.27<br>cde | 0.02<br>f   | 0.03<br>f   | 0.69<br>a  | 0.00<br>f  | 0.05<br>ef  | 0.00<br>f  | 0.02<br>f   | 0.28<br>bcd | 0.16<br>def | 0.09<br>def | 0.50<br>ab | 0.42<br>bc  | 0.02<br>f  | < 0.001         |
| Tense/<br>Bothered        | 0.39<br>a   | 0.02<br>c   | 0.02<br>c   | 0.11<br>bc | 0.00<br>c  | 0.02<br>c   | 0.00<br>c  | 0.02<br>c   | 0.23<br>ab  | 0.36<br>a   | 0.05<br>bc  | 0.38<br>a  | 0.11<br>bc  | 0.08<br>bc | < 0.001         |
| Jittery/<br>Nervous       | 0.13<br>ab  | 0.05<br>b   | 0.00<br>b   | 0.03<br>b  | 0.02<br>b  | 0.05<br>b   | 0.02<br>b  | 0.00<br>b   | 0.11<br>b   | 0.27<br>a   | 0.11<br>b   | 0.08<br>b  | 0.05<br>b   | 0.00<br>b  | < 0.001         |

<sup>1</sup>BA = baluts; BE = boiled eggs; BR = broccoli; BT = burnt toast; CA = cake; CO = coffee; CR = cooked rice; GT = green tea; HA = haggis; KI = Kimchi; MO = molded oranges; RA = rotten avocado; ST = steak

<sup>2</sup>The proportions with different letters within a row represent a significant difference at  $p < 0.05$ .

**Supplementary Table S6. A contingency table of the proportions of citations by 105 participants across the 14 food image samples for individual pairs of emotion terms in the multiple response condition of Study 2**

| Emotion-related terms     | BA          | BE           | BR          | BT          | CA         | CO           | CR          | GT          | GF          | HA          | KI           | MO          | SA          | ST          | <i>P</i> -value |
|---------------------------|-------------|--------------|-------------|-------------|------------|--------------|-------------|-------------|-------------|-------------|--------------|-------------|-------------|-------------|-----------------|
| Active/<br>Alert          | 0.14<br>cd  | 0.23<br>abcd | 0.16<br>cd  | 0.08<br>d   | 0.47<br>a  | 0.44<br>ab   | 0.11<br>cd  | 0.09<br>d   | 0.20<br>bcd | 0.14<br>cd  | 0.45<br>a    | 0.05<br>d   | 0.09<br>d   | 0.34<br>abc | < 0.001         |
| Energetic/<br>Excited     | 0.05<br>de  | 0.22<br>cde  | 0.13<br>de  | 0.05<br>de  | 0.70<br>a  | 0.47<br>ab   | 0.16<br>de  | 0.08<br>de  | 0.20<br>cde | 0.11<br>de  | 0.28<br>bcd  | 0.00<br>e   | 0.09<br>de  | 0.42<br>bc  | < 0.001         |
| Enthusiastic/<br>Inspired | 0.03<br>d   | 0.17<br>bcd  | 0.22<br>bcd | 0.02<br>d   | 0.58<br>a  | 0.34<br>bc   | 0.13<br>cd  | 0.11<br>d   | 0.14<br>cd  | 0.06<br>d   | 0.39<br>ab   | 0.02<br>d   | 0.06<br>d   | 0.34<br>bc  | < 0.001         |
| Happy/<br>Satisfied       | 0.02<br>ef  | 0.61<br>ab   | 0.45<br>abc | 0.00<br>f   | 0.70<br>a  | 0.50<br>abc  | 0.44<br>abc | 0.39<br>bcd | 0.14<br>def | 0.06<br>ef  | 0.28<br>cde  | 0.00<br>f   | 0.14<br>def | 0.67<br>A   | < 0.001         |
| Secure/<br>At ease        | 0.02<br>e   | 0.40<br>ab   | 0.48<br>a   | 0.02<br>e   | 0.09<br>de | 0.33<br>abcd | 0.50<br>a   | 0.53<br>a   | 0.09<br>de  | 0.00<br>e   | 0.17<br>bcde | 0.00<br>e   | 0.11<br>cde | 0.34<br>abc | < 0.001         |
| Relaxed/<br>Calm          | 0.00<br>d   | 0.50<br>abc  | 0.56<br>ab  | 0.03<br>d   | 0.14<br>d  | 0.42<br>bc   | 0.61<br>ab  | 0.72<br>a   | 0.05<br>d   | 0.03<br>d   | 0.11<br>d    | 0.02<br>d   | 0.11<br>d   | 0.25<br>cd  | < 0.001         |
| Passive/<br>Quiet         | 0.08<br>c   | 0.16<br>bc   | 0.22<br>bc  | 0.05<br>c   | 0.06<br>c  | 0.14<br>bc   | 0.28<br>ab  | 0.47<br>a   | 0.06<br>c   | 0.03<br>c   | 0.09<br>bc   | 0.03<br>c   | 0.11<br>ab  | 0.03<br>c   | < 0.001         |
| Dull/<br>Bored            | 0.05<br>b   | 0.11<br>ab   | 0.20<br>ab  | 0.16<br>ab  | 0.05<br>b  | 0.03<br>b    | 0.28<br>a   | 0.11<br>ab  | 0.03<br>b   | 0.13<br>ab  | 0.05<br>b    | 0.13<br>ab  | 0.14<br>ab  | 0.03<br>b   | < 0.001         |
| Blue/<br>Uninspired       | 0.16<br>bcd | 0.08<br>cd   | 0.05<br>d   | 0.38<br>a   | 0.00<br>d  | 0.02<br>d    | 0.09<br>cd  | 0.06<br>cd  | 0.17<br>bcd | 0.16<br>bcd | 0.03<br>d    | 0.25<br>abc | 0.31<br>ab  | 0.02<br>d   | < 0.001         |
| Unhappy/<br>Dissatisfied  | 0.64<br>bc  | 0.05<br>e    | 0.03<br>e   | 0.89<br>ab  | 0.06<br>e  | 0.06<br>e    | 0.03<br>e   | 0.05<br>e   | 0.41<br>cd  | 0.41<br>cd  | 0.17<br>de   | 0.92<br>a   | 0.56<br>c   | 0.03<br>e   | < 0.001         |
| Tense/<br>Bothered        | 0.59<br>a   | 0.03<br>c    | 0.00<br>c   | 0.45<br>a   | 0.00<br>c  | 0.02<br>c    | 0.00<br>c   | 0.03<br>c   | 0.39<br>ab  | 0.45<br>a   | 0.16<br>bc   | 0.58<br>a   | 0.41<br>a   | 0.08<br>c   | < 0.001         |
| Jittery/<br>Nervous       | 0.53<br>a   | 0.00<br>d    | 0.00<br>d   | 0.17<br>bcd | 0.00<br>d  | 0.13<br>cd   | 0.00<br>d   | 0.02<br>d   | 0.39<br>ab  | 0.48<br>a   | 0.16<br>cd   | 0.31<br>abc | 0.16<br>cd  | 0.06<br>d   | < 0.001         |

<sup>1</sup>BA = baluts; BE = boiled eggs; BR = broccoli; BT = burnt toast; CA = cake; CO = coffee; CR = cooked rice; GT = green tea; HA = haggis; KI = Kimchi; MO = molded oranges; RA = rotten avocado; ST = steak

<sup>2</sup>The proportions with different letters within a row represent a significant difference at  $p < 0.05$ .

**Supplementary Figure S1. Fourteen food image samples<sup>1</sup> used in this study**

| Name                                   | Image                                                                               | Name                                            | Image                                                                                |
|----------------------------------------|-------------------------------------------------------------------------------------|-------------------------------------------------|--------------------------------------------------------------------------------------|
| Balut                                  |    | Unpeeled boiled egg and half eggs (boiled eggs) |    |
| Birthday cake                          |    | Grilled saury (grilled fishes)                  |    |
| Brewed coffee (coffee)                 |   | Scottish haggis (haggis)                        |   |
| Brewed green tea (green tea)           |  | Kimchi                                          |  |
| Steamed and sliced broccoli (broccoli) |  | Molded oranges                                  |  |

**Supplementary Figure S1. Fourteen food image samples<sup>1</sup> used in this study (Continued)**

| Name                                   | Image                                                                             | Name                                 | Image                                                                              |
|----------------------------------------|-----------------------------------------------------------------------------------|--------------------------------------|------------------------------------------------------------------------------------|
| Burnt toast bread slices (burnt toast) |  | Half rotten avocado (rotten avocado) |  |
| Cooked rice                            |  | Beef steak (steak)                   |  |

<sup>1</sup>All image samples were purchased and adapted with permission from a commercial web provider (Dreamstime, Brentwood, TN, USA).
